# Supplementary material
Source: PubMed Central journal article supplement (PMC4496004)

A.

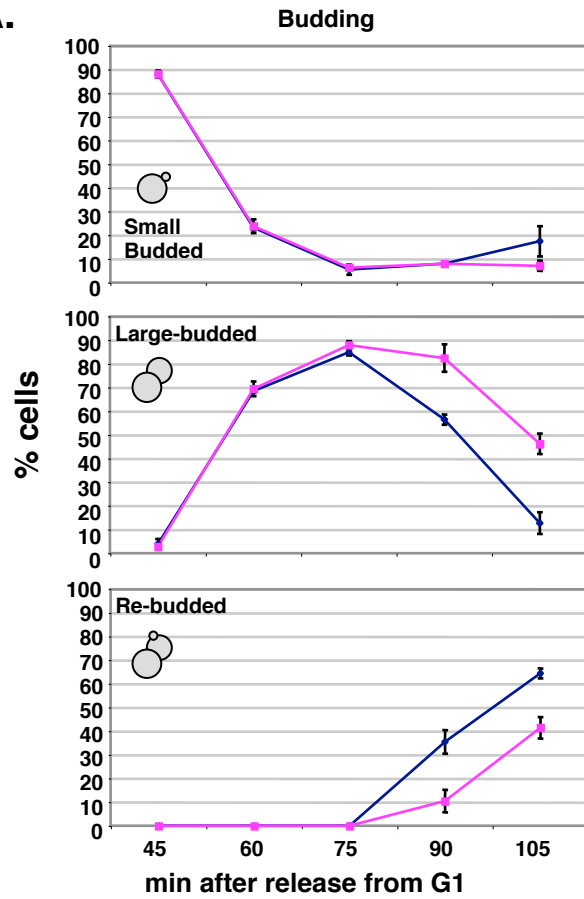

B.

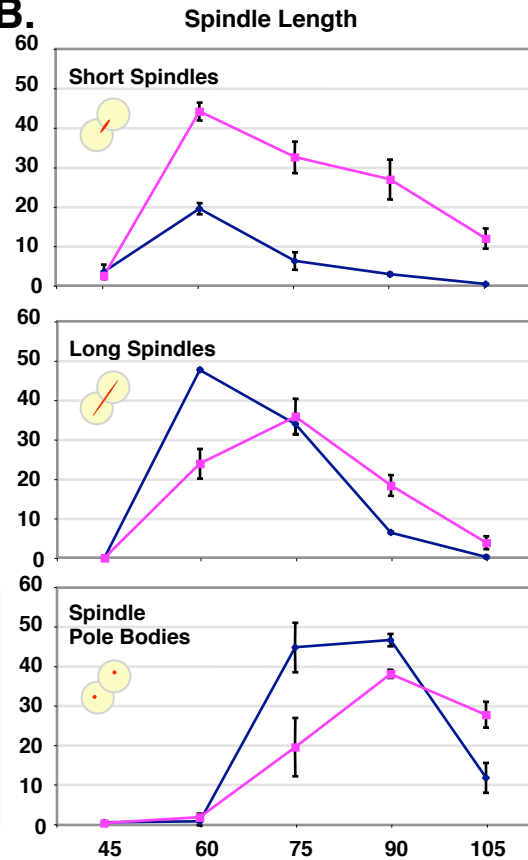

C.

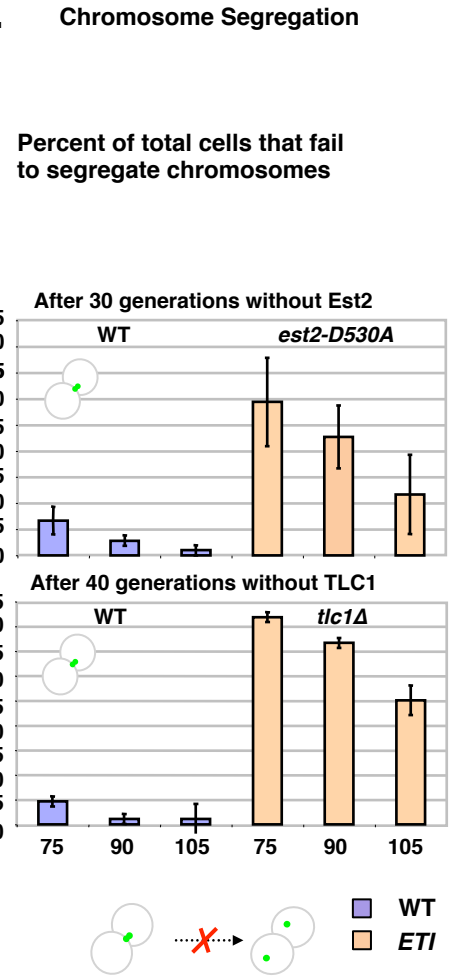

D.

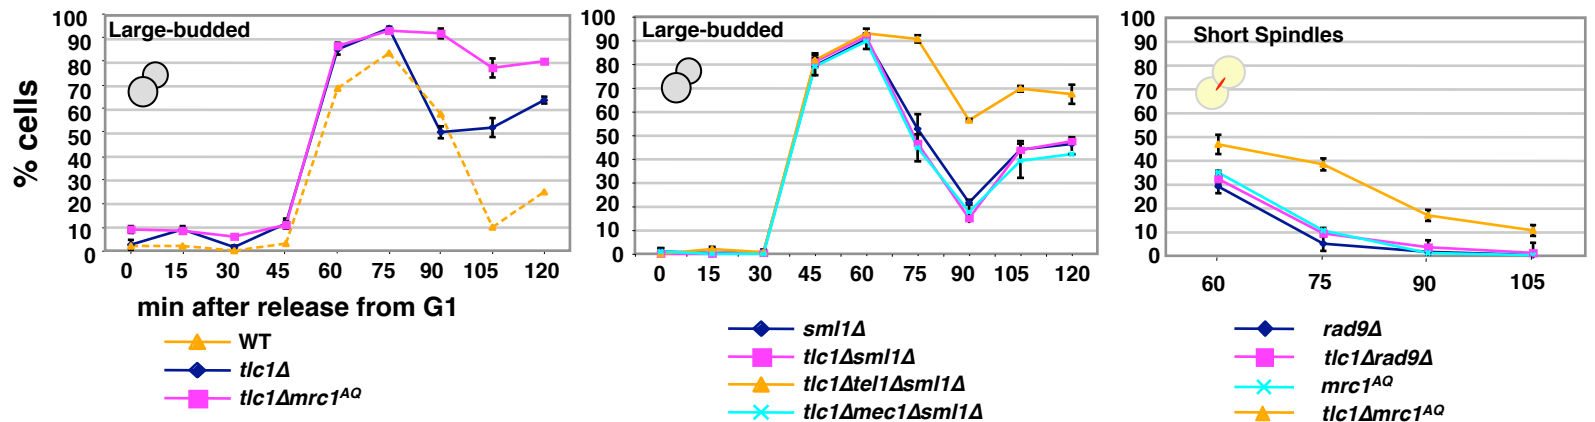

Supplement: NIHMS665530-supplement-2.pdf [file NIHMS665530-supplement-2.pdf]

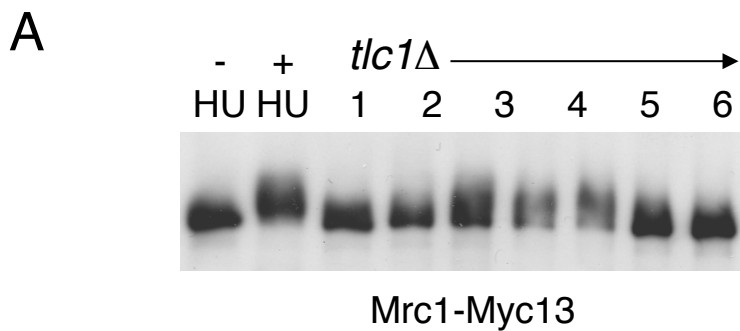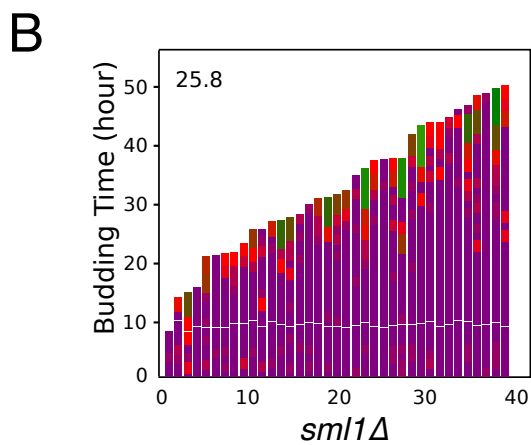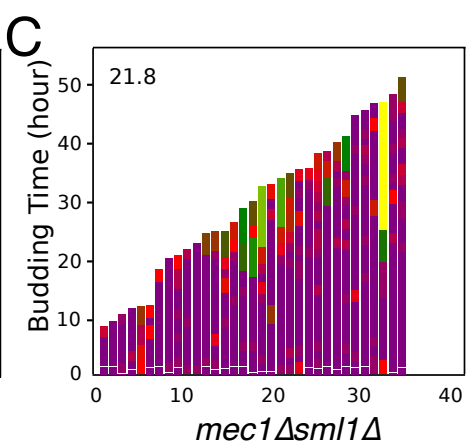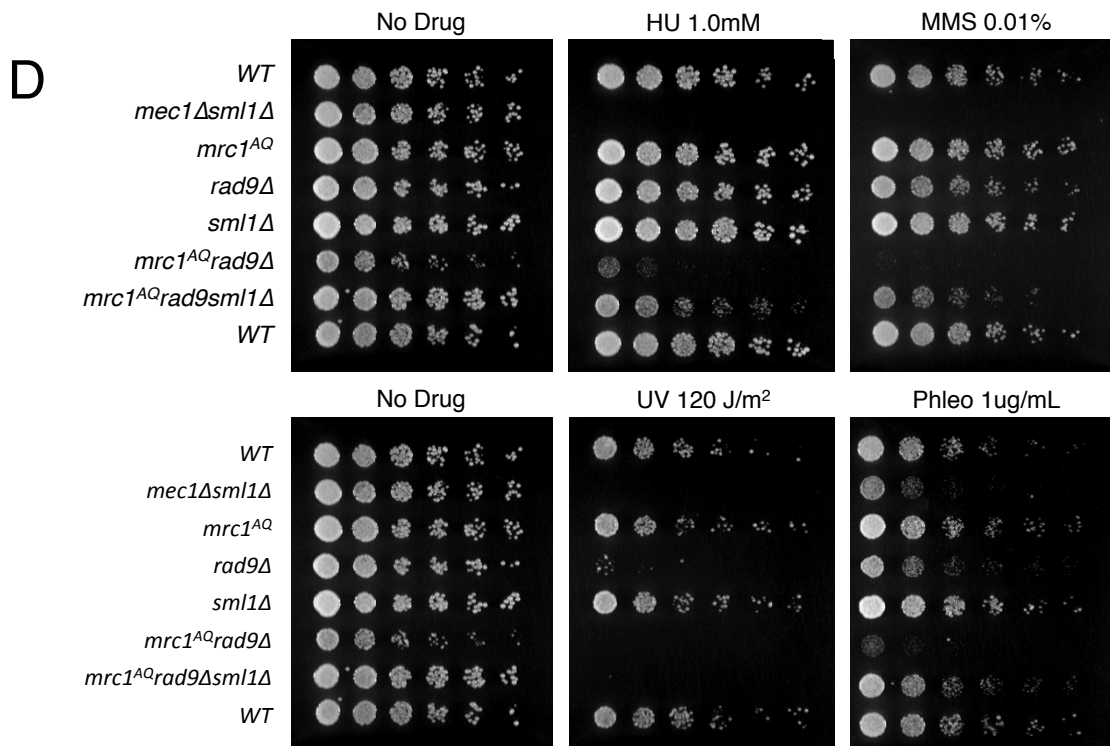

Supplement: NIHMS665530-supplement-5.pdf [file NIHMS665530-supplement-5.pdf]
